# Supplementary material
Source: PubMed Central journal article supplement (PMC3795817)

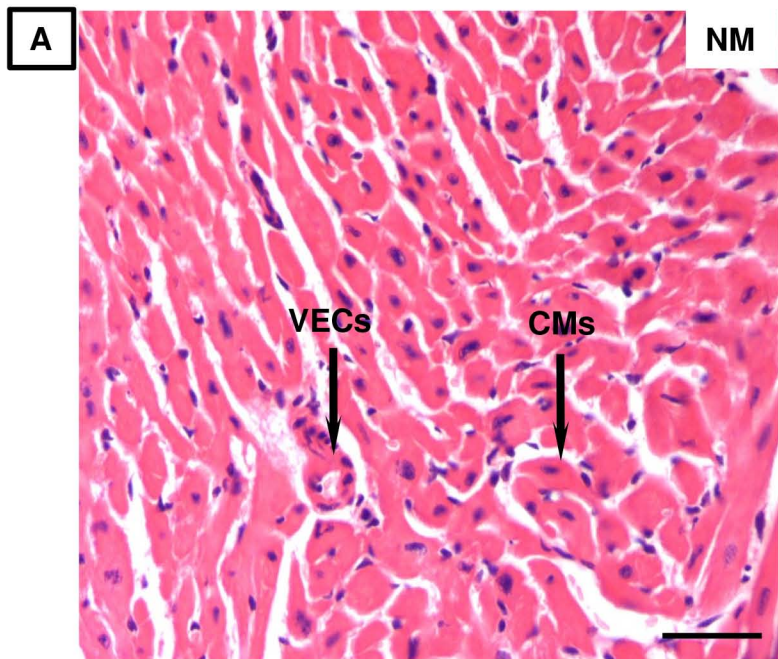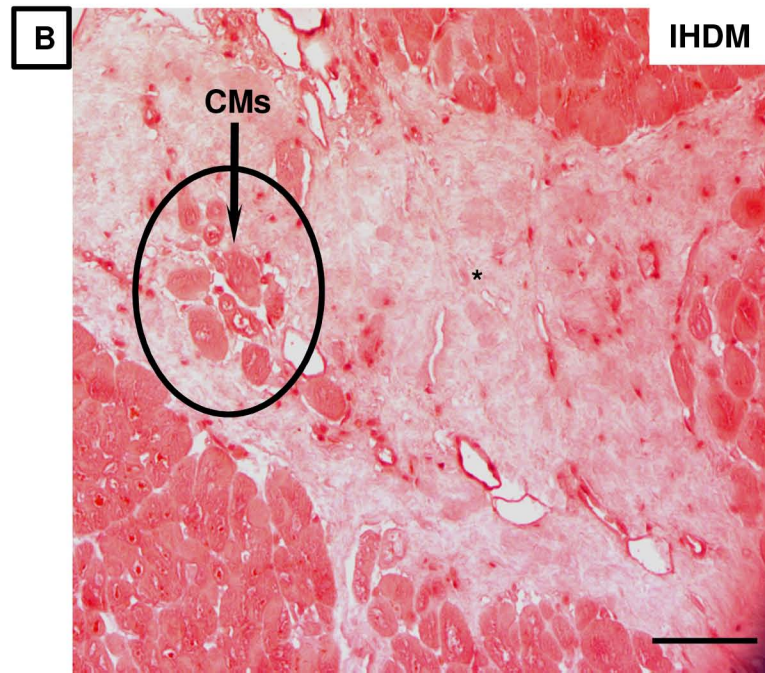

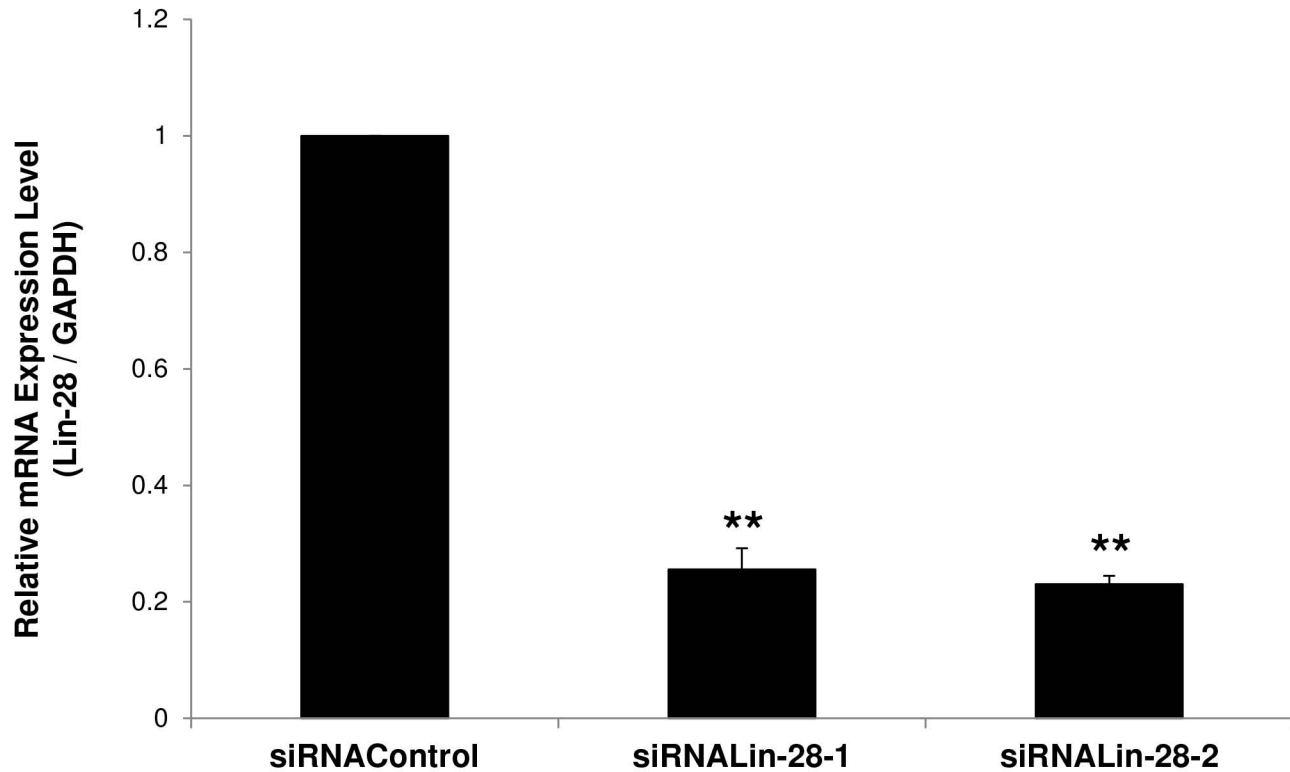

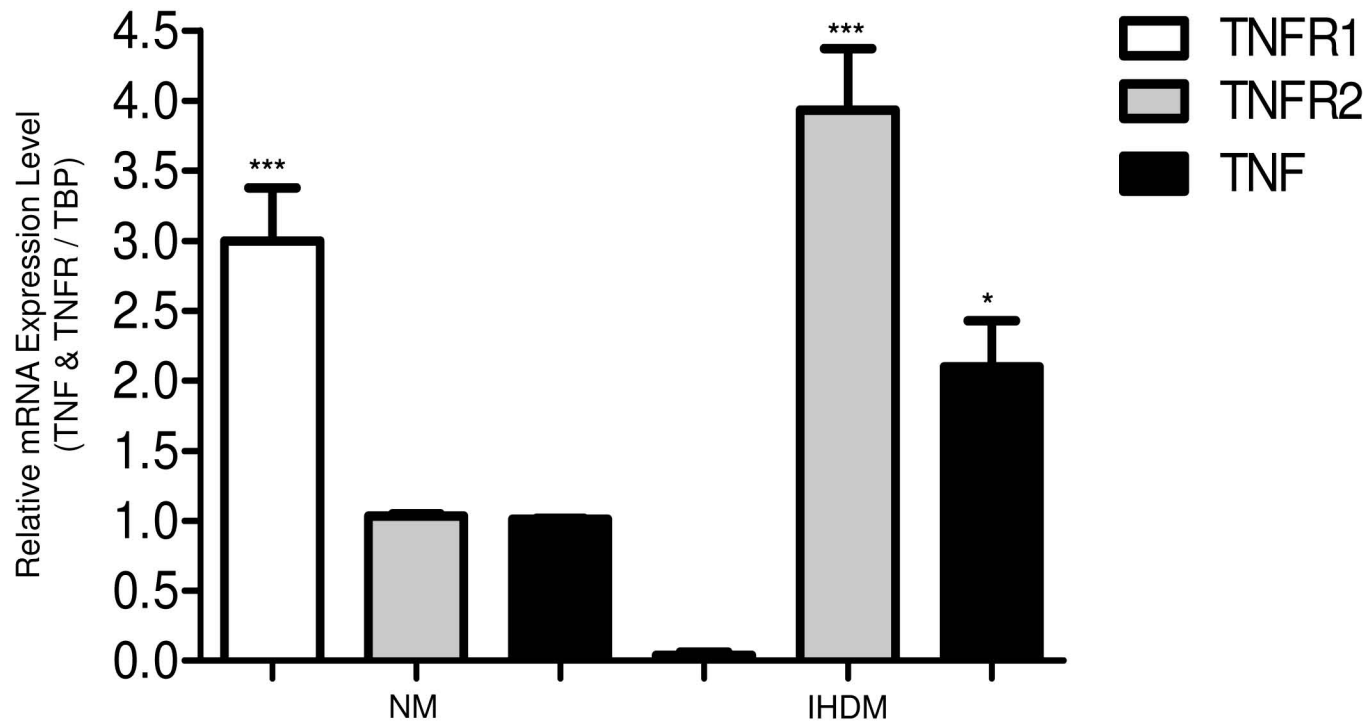

Supplementary Figure 3

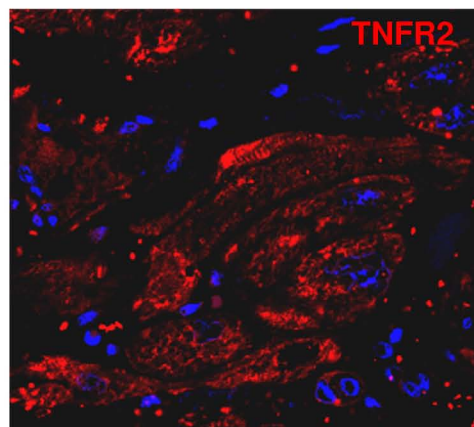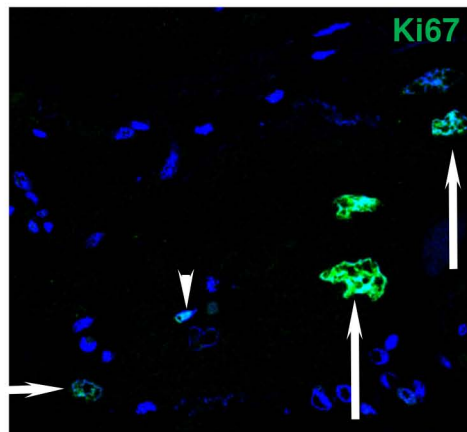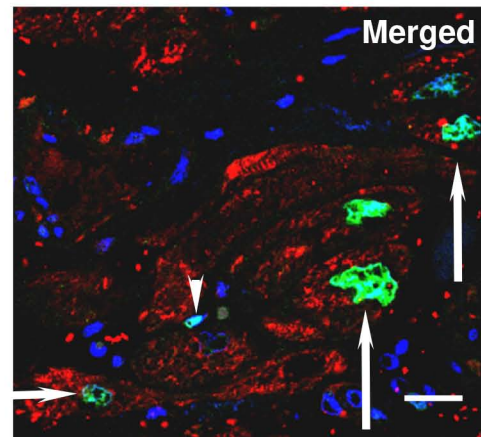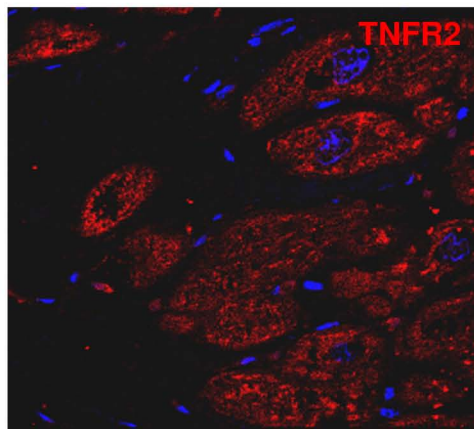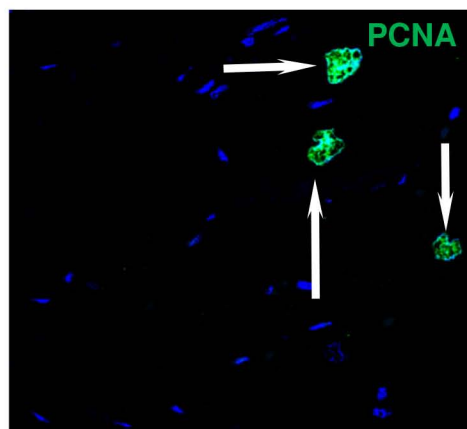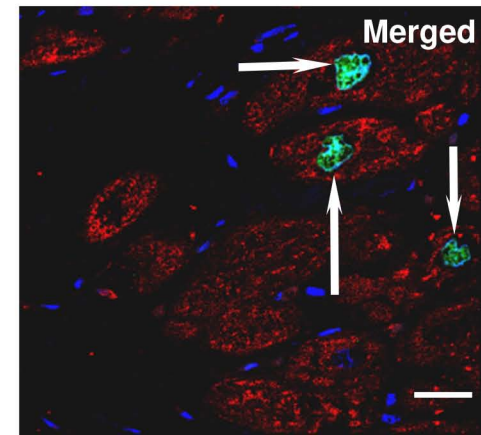

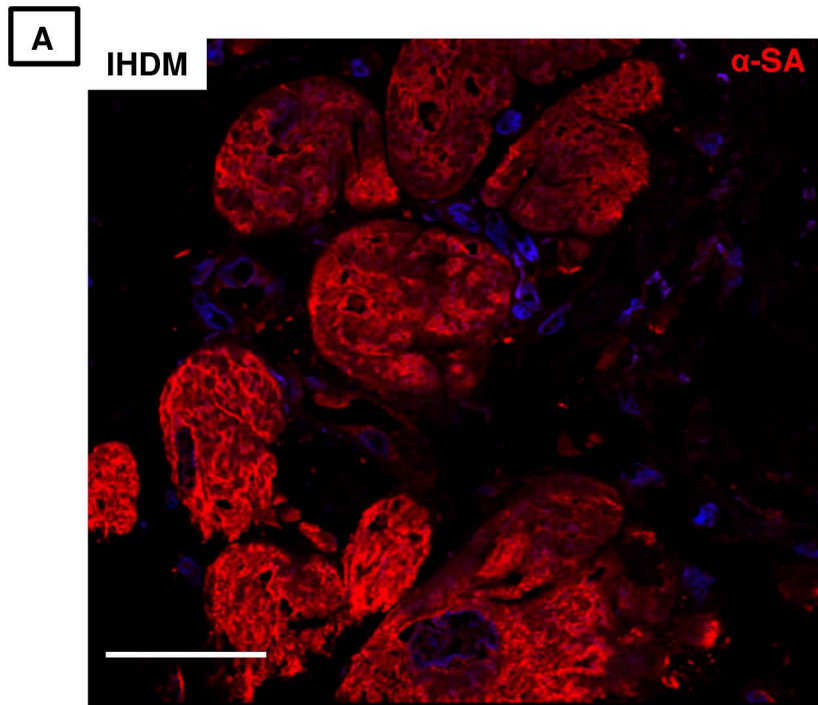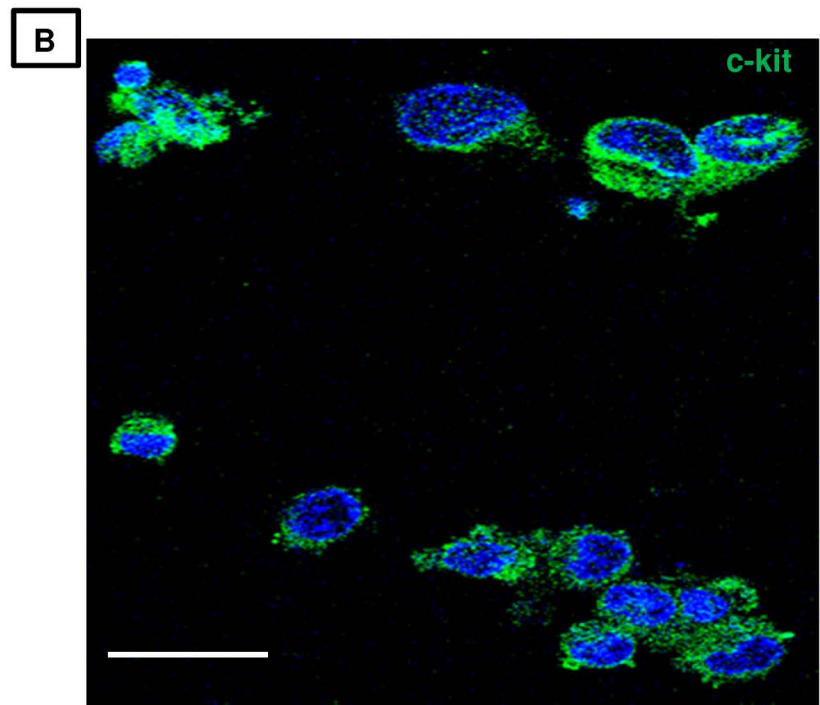



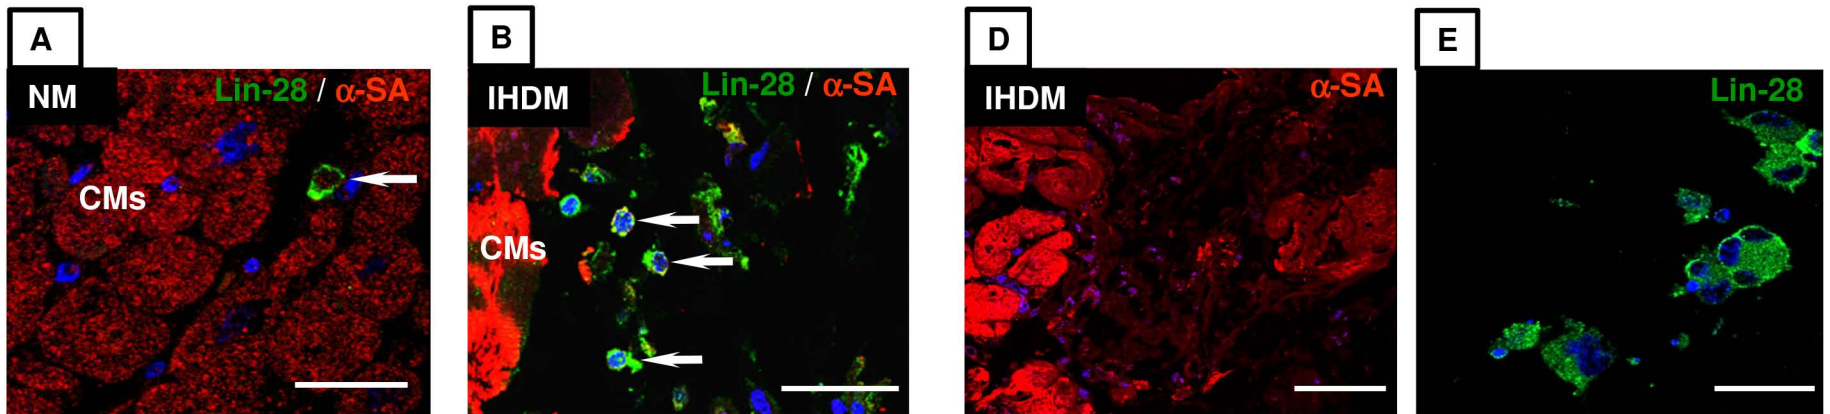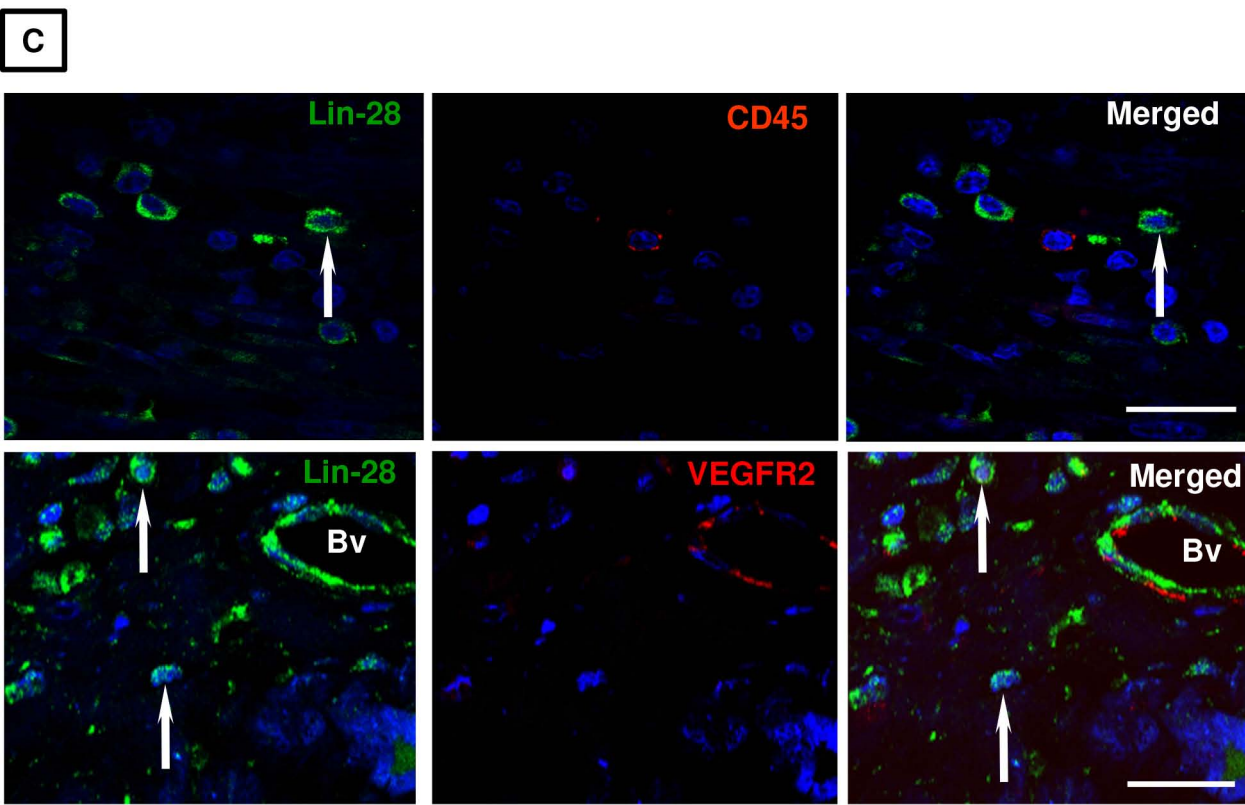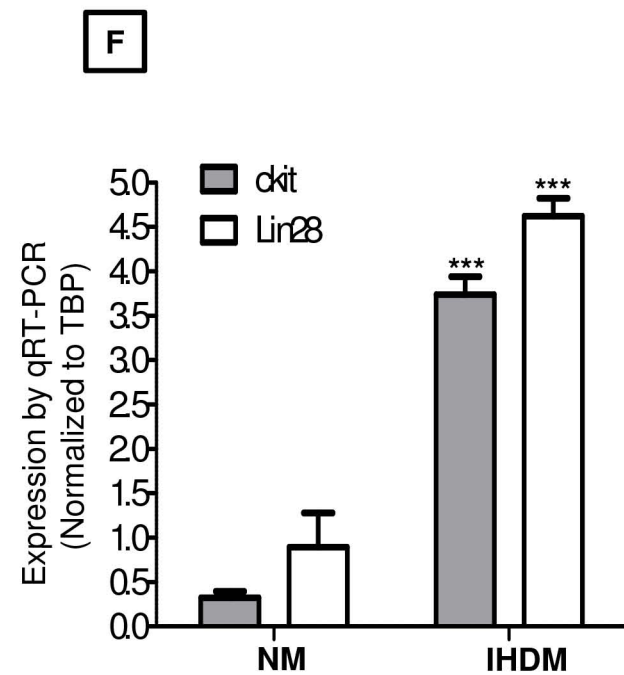

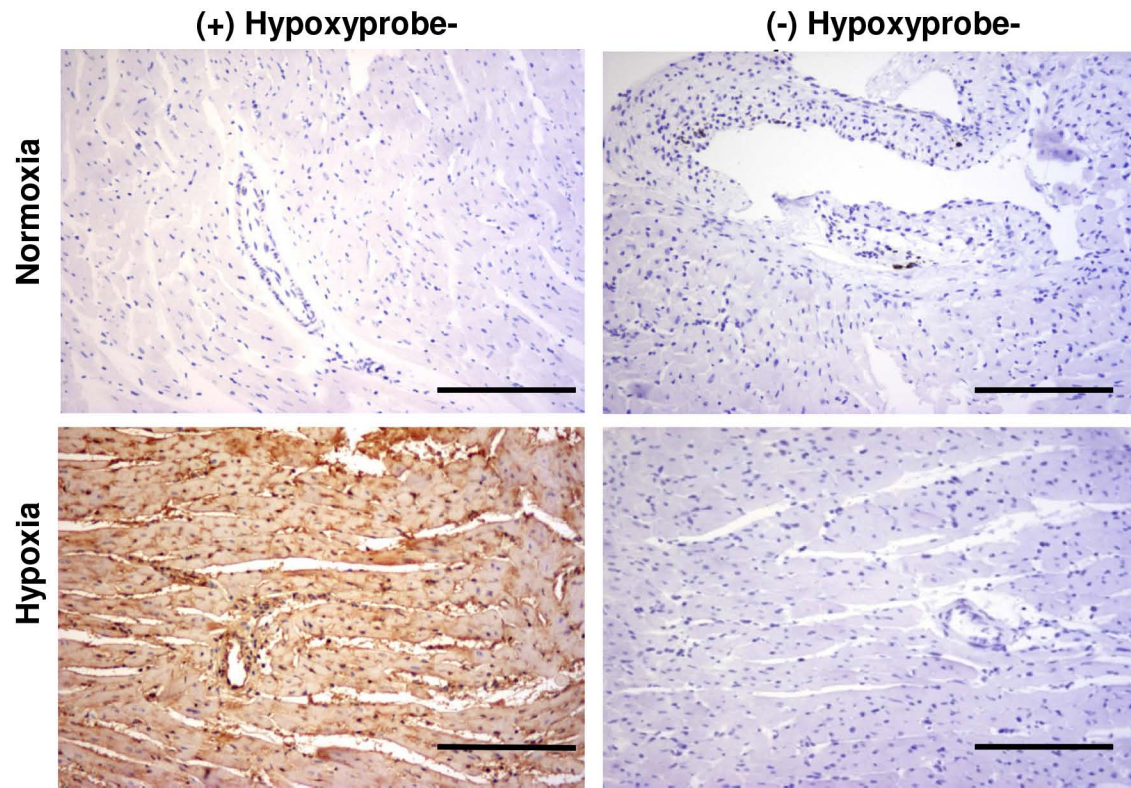



Supplementary Figure 7

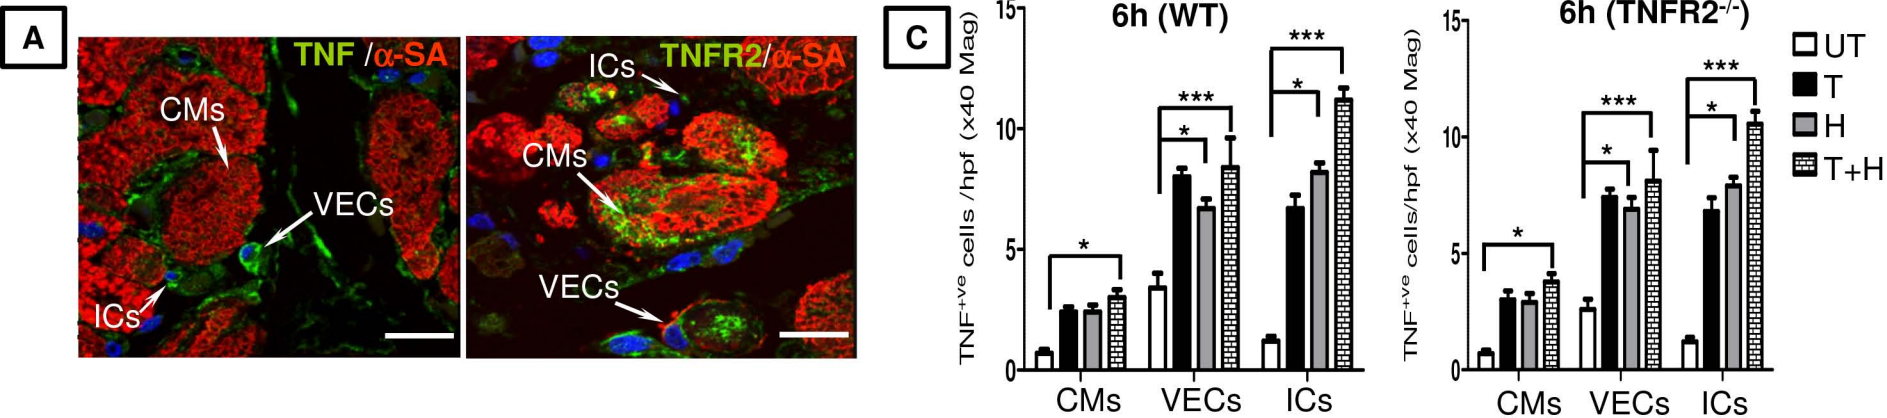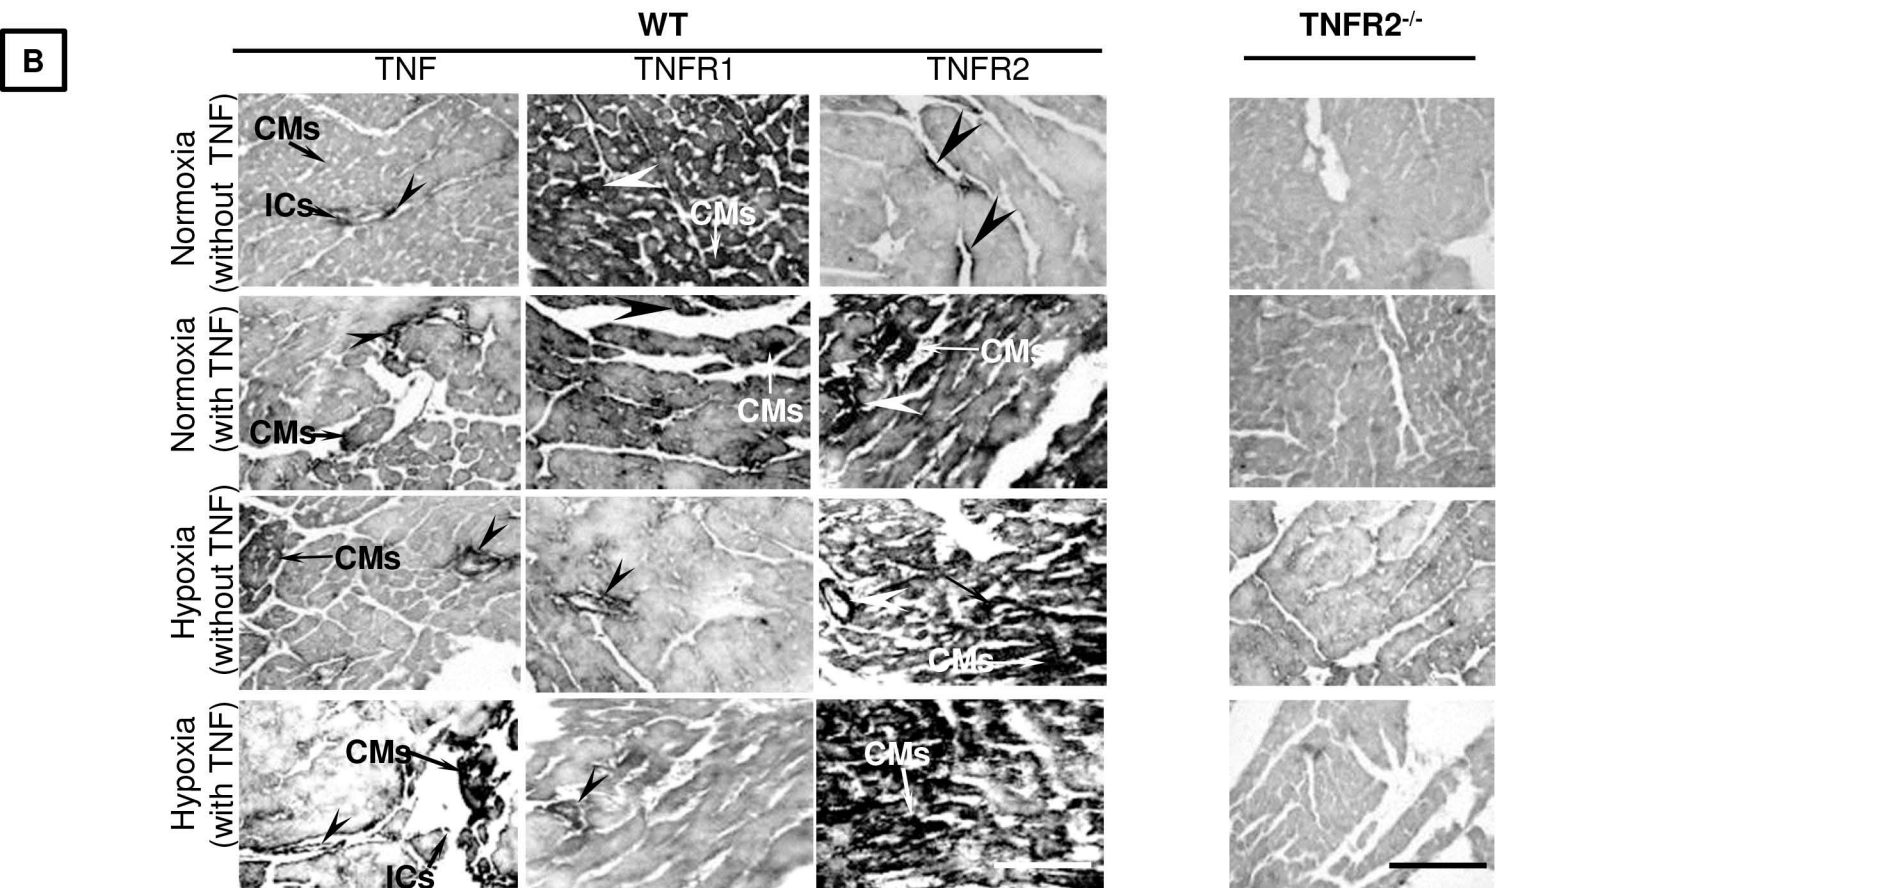



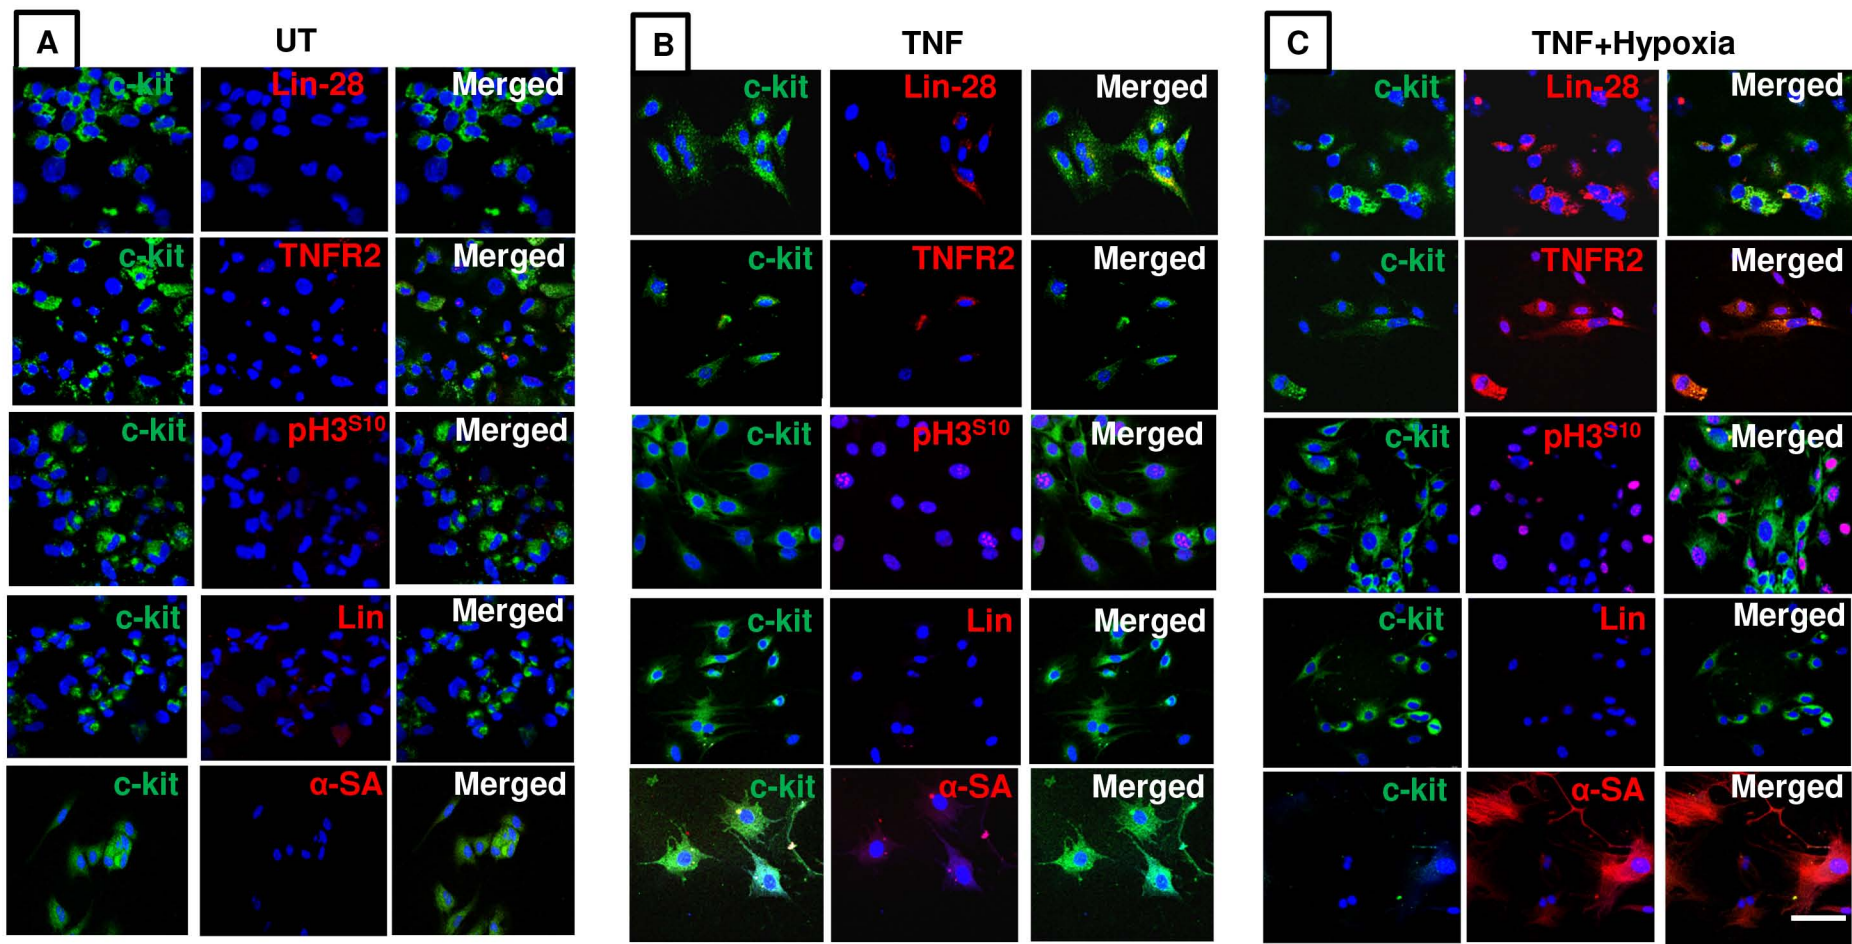

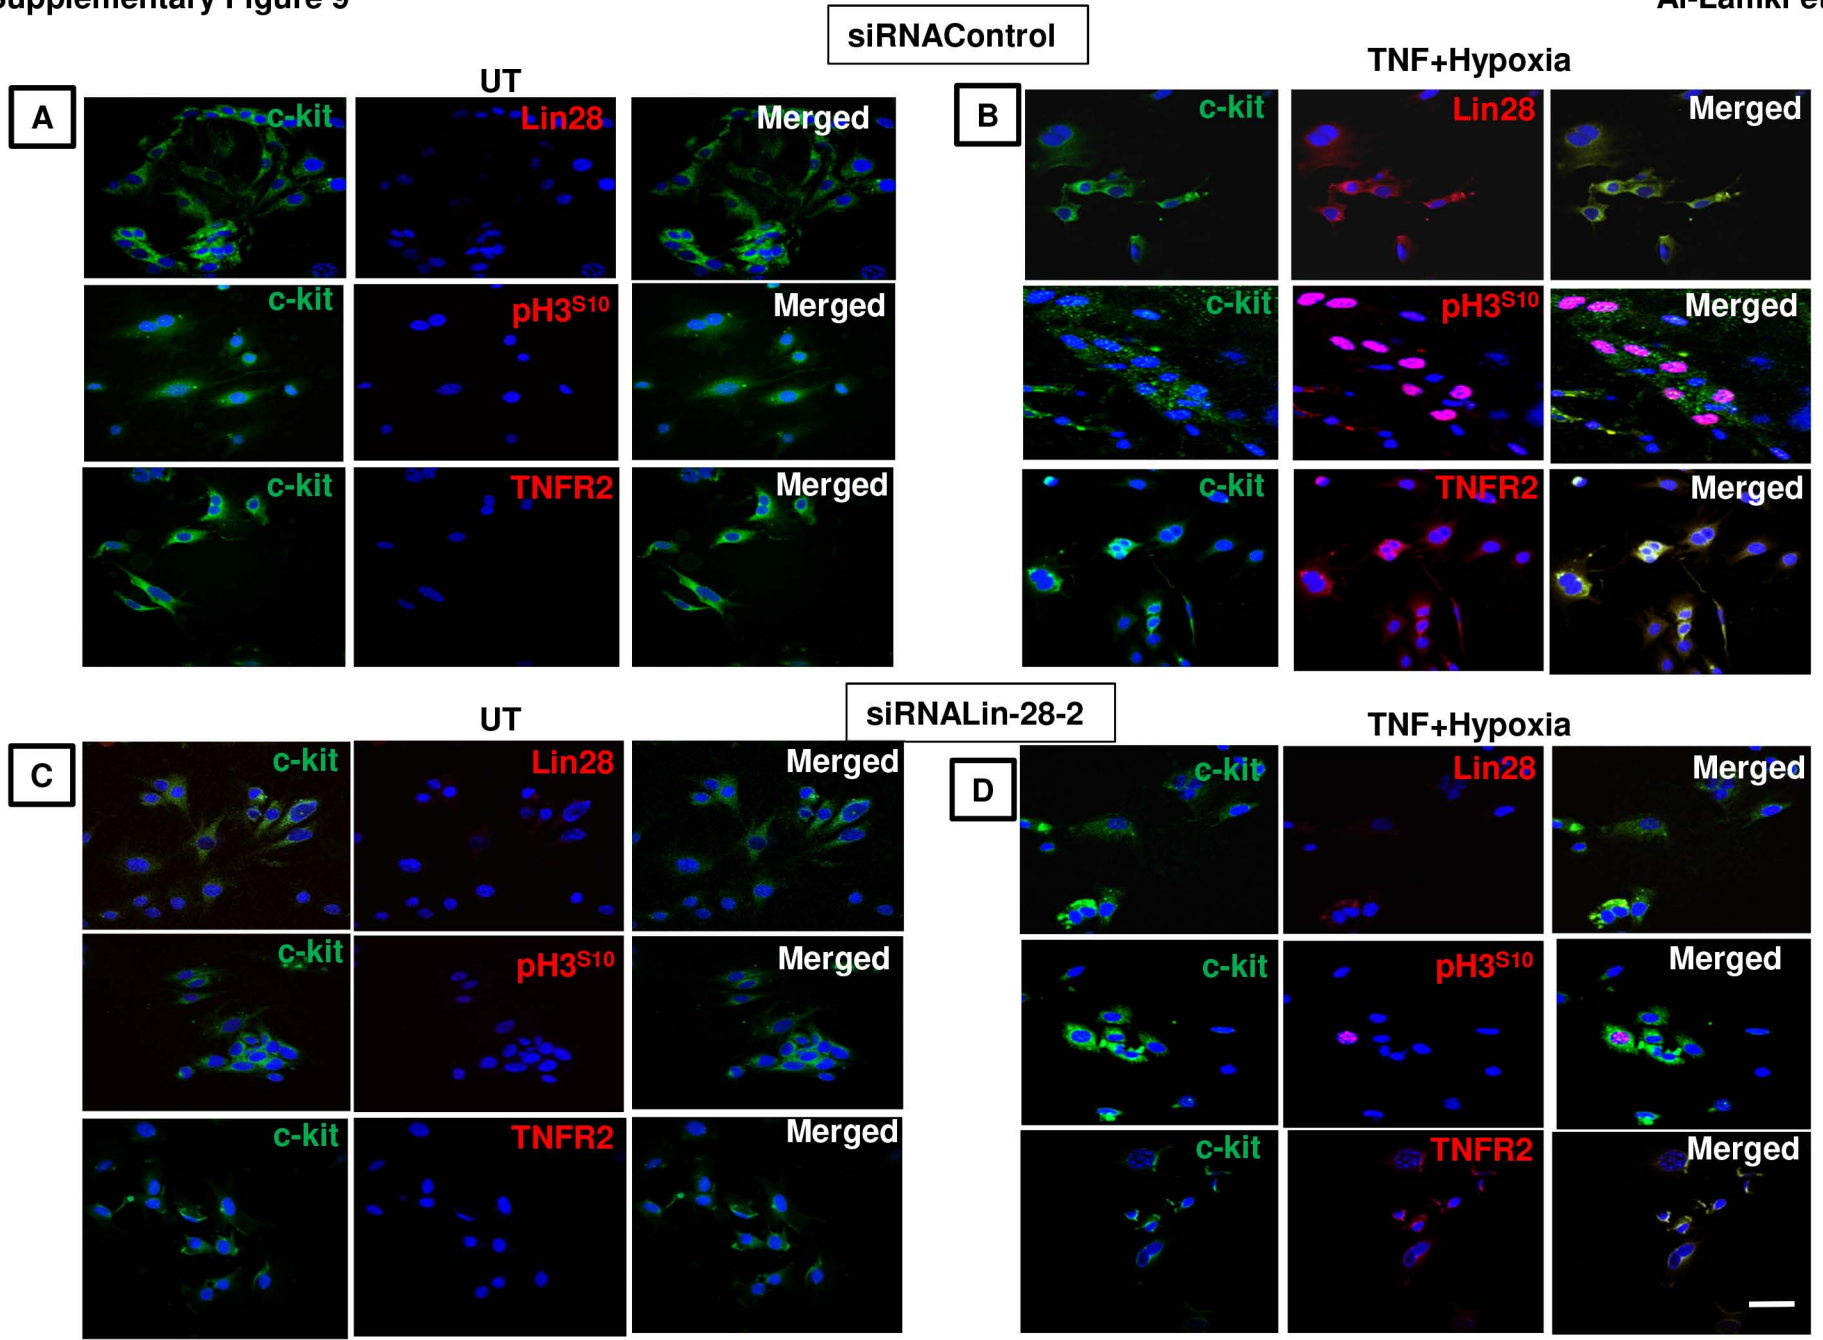

Supplement: NIHMS502955-supplement-Supp_Fig_S1-S10.pdf [file NIHMS502955-supplement-Supp_Fig_S1-S10.pdf]
